# Supplementary material for: Quantitative Assessment of Serine-8 Phosphorylated β-Amyloid Using MALDI-TOF Mass Spectrometry
Source: MDPI journal article supplement (doi:10.3390/molecules27238406), 2022-12-01
Supplement: s1 [file s1]

# Supporting Information

Article

## Quantitative Assessment of Serine-8 Phosphorylated $\beta$ -amyloid using MALDI-TOF Mass Spectrometry

Andrey Kuzin; Galina S. Stupnikova; Polina A. Strelnikova; Ksenia V. Danichkina; Maria I. Indeykina; Stanislav I. Pekov\*; Igor A. Popov\*

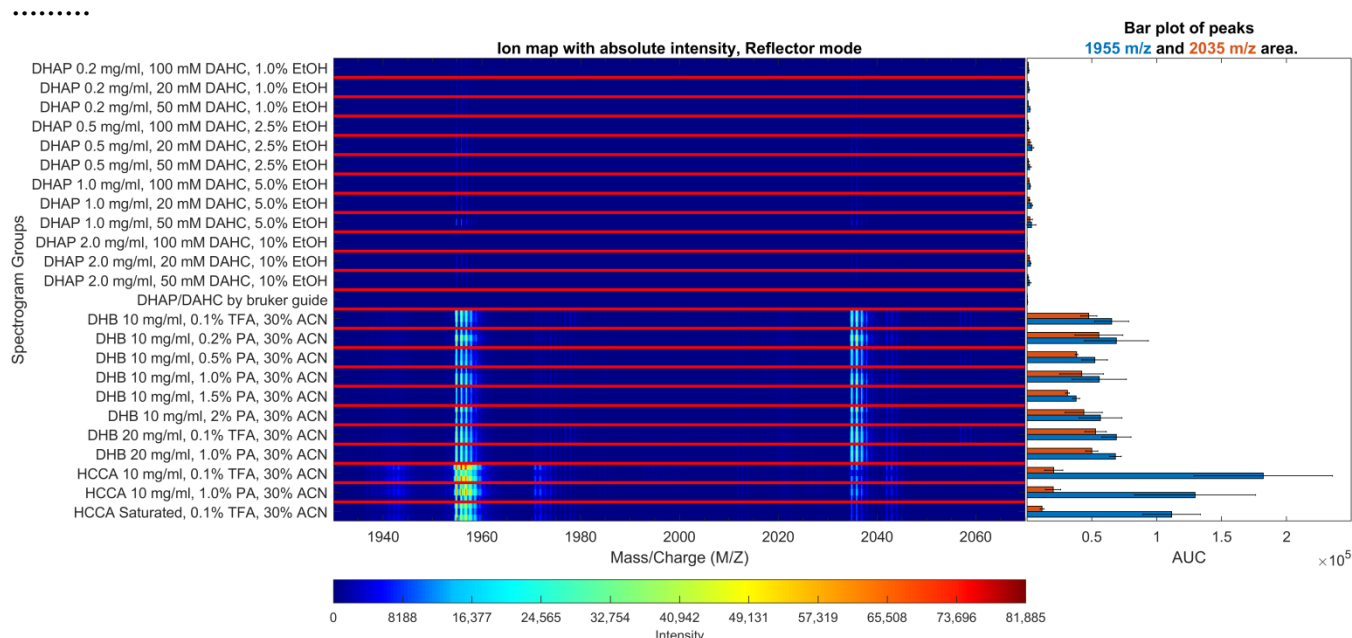

.....

Figure S1. Ion map for pSer8- A $\beta$ 16 mass spectra obtained using different matrices with the addition of various concentrations of phosphoric and trifluoroacetic acid in reflectron mode. A $\beta$ 16 corresponds to m/z 1955, pSer8- A $\beta$ 16 corresponds to m/z 2035.

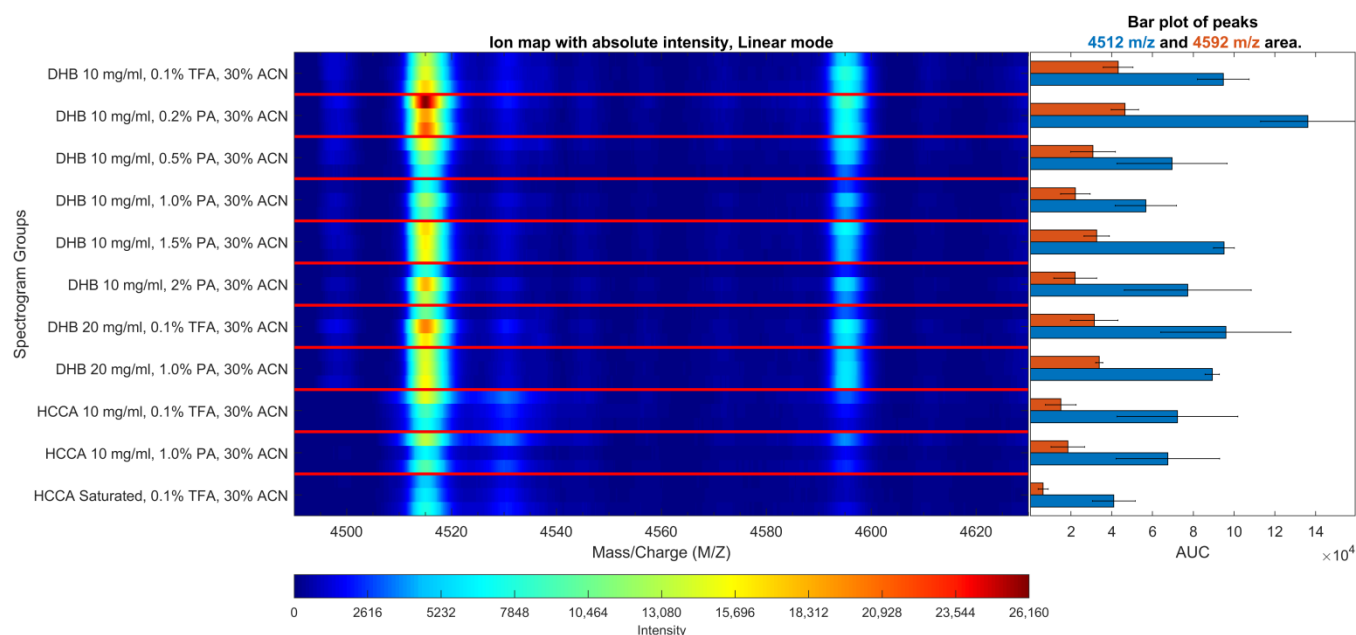

**Figure S2. Ion map for pSer8- A $\beta$ 42 mass spectra obtained using DHB and HCCA matrices with the addition of various concentrations of phosphoric and trifluoroacetic acid in linear mode. A $\beta$ 42 corresponds to m/z 4512, pSer8- A $\beta$ 42 corresponds to m/z 4592.**

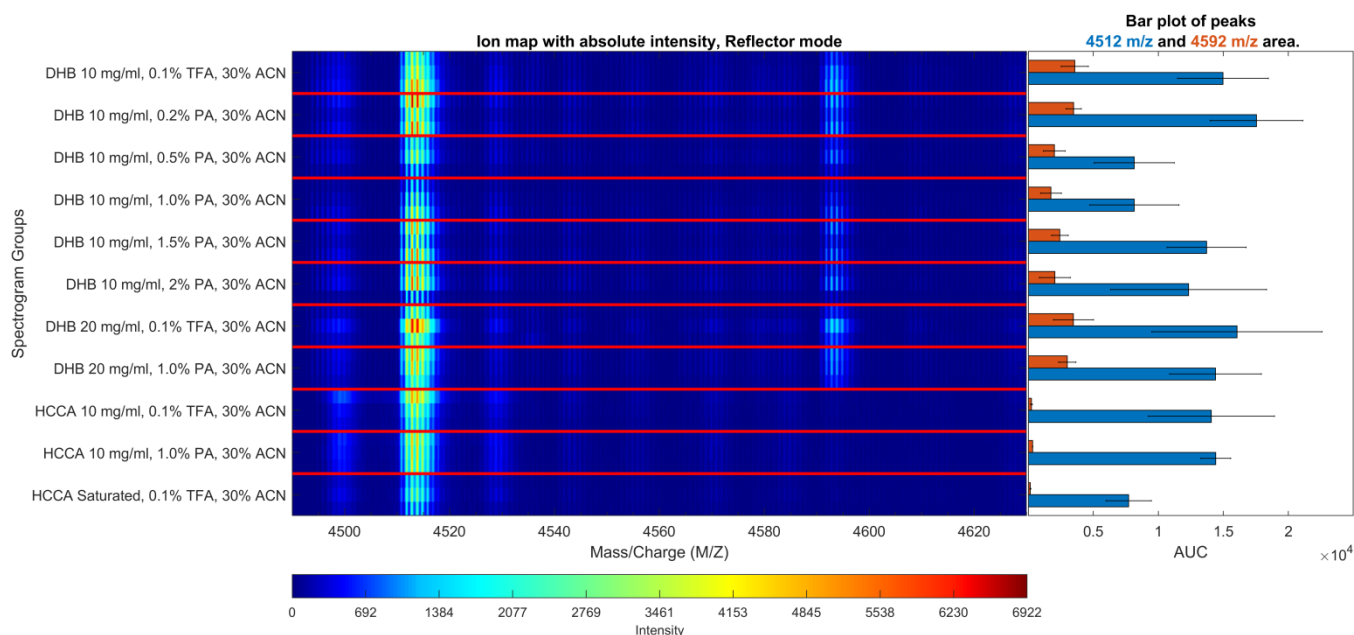

**Figure S3. Ion map for pSer8- A $\beta$ 42 mass spectra obtained using DHB and HCCA matrices with the addition of various concentrations of phosphoric and trifluoroacetic acid in reflectron. A $\beta$ 42 corresponds to m/z 4512, pSer8- A $\beta$ 42 corresponds to m/z 4592.**



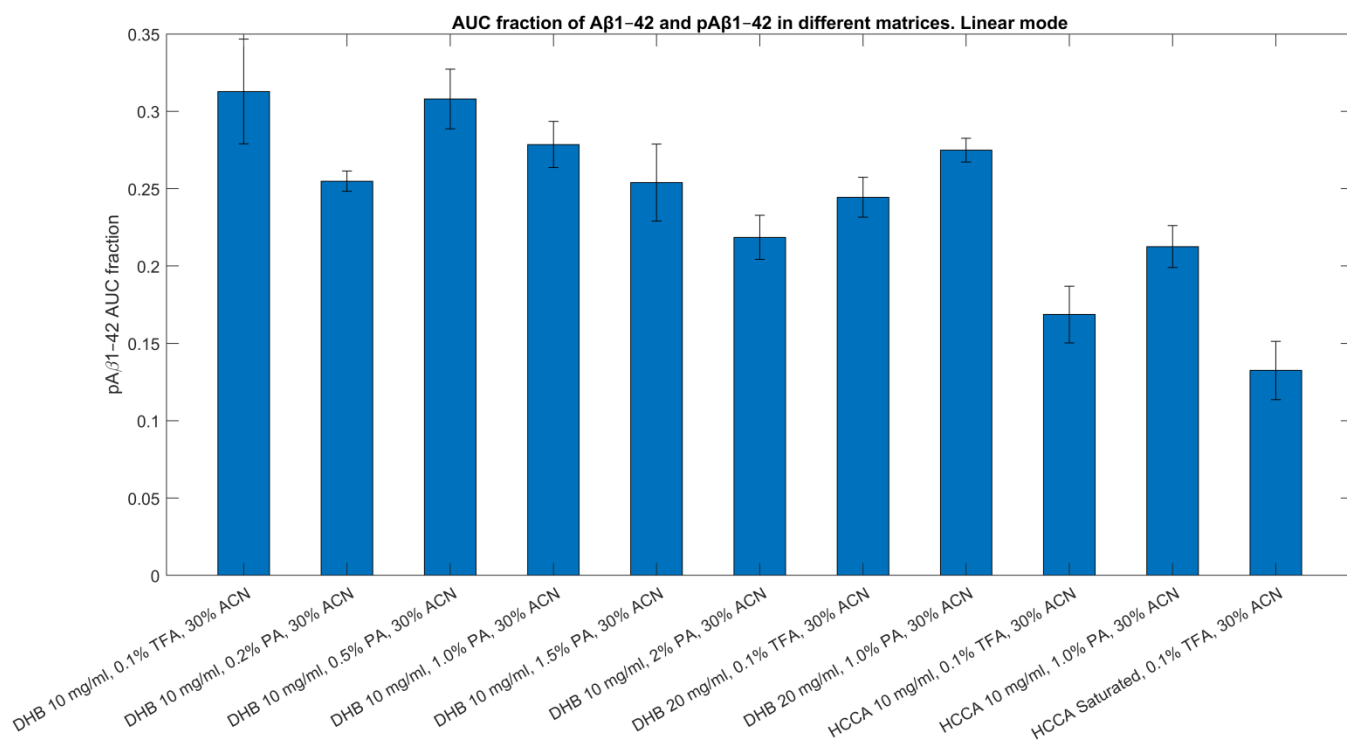

**Figure S6. Comparison of the areas under the curves corresponding to pSer8-A $\beta$ 42 and A $\beta$  peaks using different matrix solutions using linear mode.**

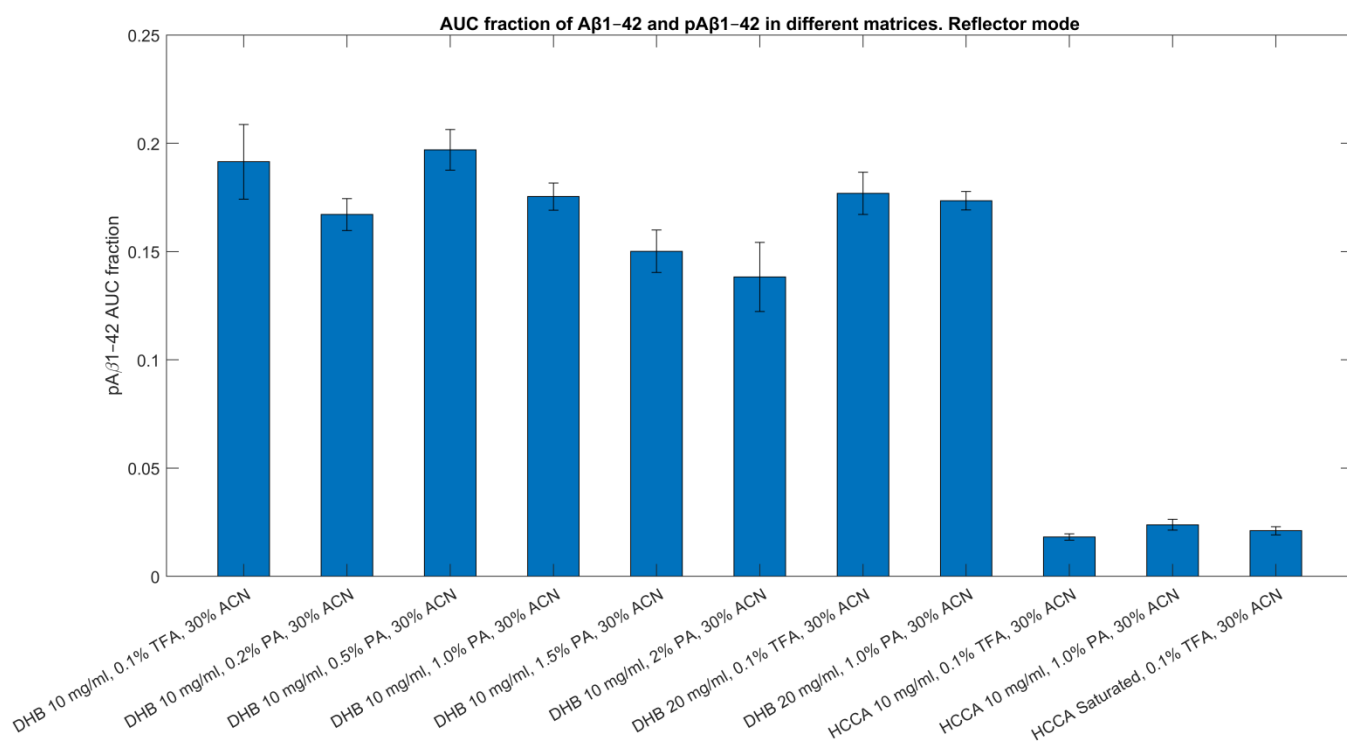

**Figure S7. Comparison of the areas under the curves corresponding to pSer8-A $\beta$ 42 and A $\beta$  peaks using different matrix solutions using reflectron mode.**

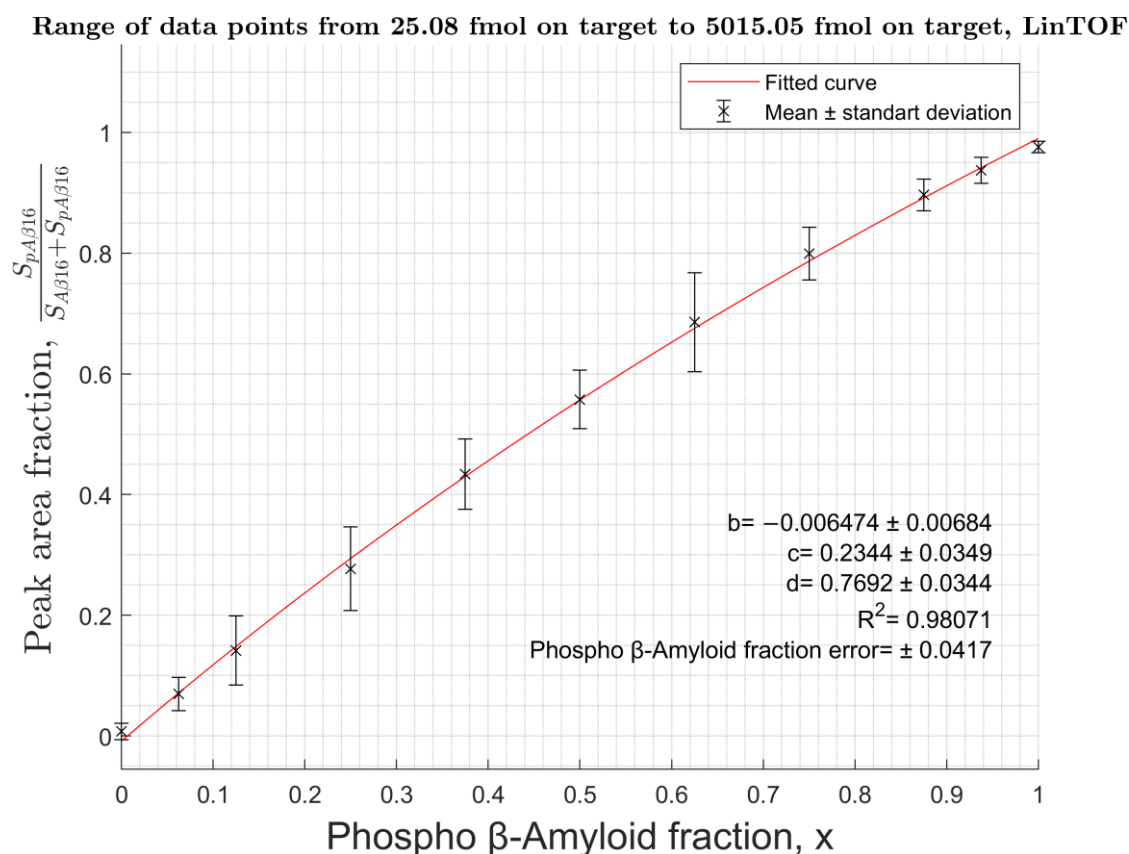

**Figure S8. Calibration curve for A $\beta$ 16 in linear mode on a Polished Steel target, 10 mg/ml DHB, 0.5% PA.**

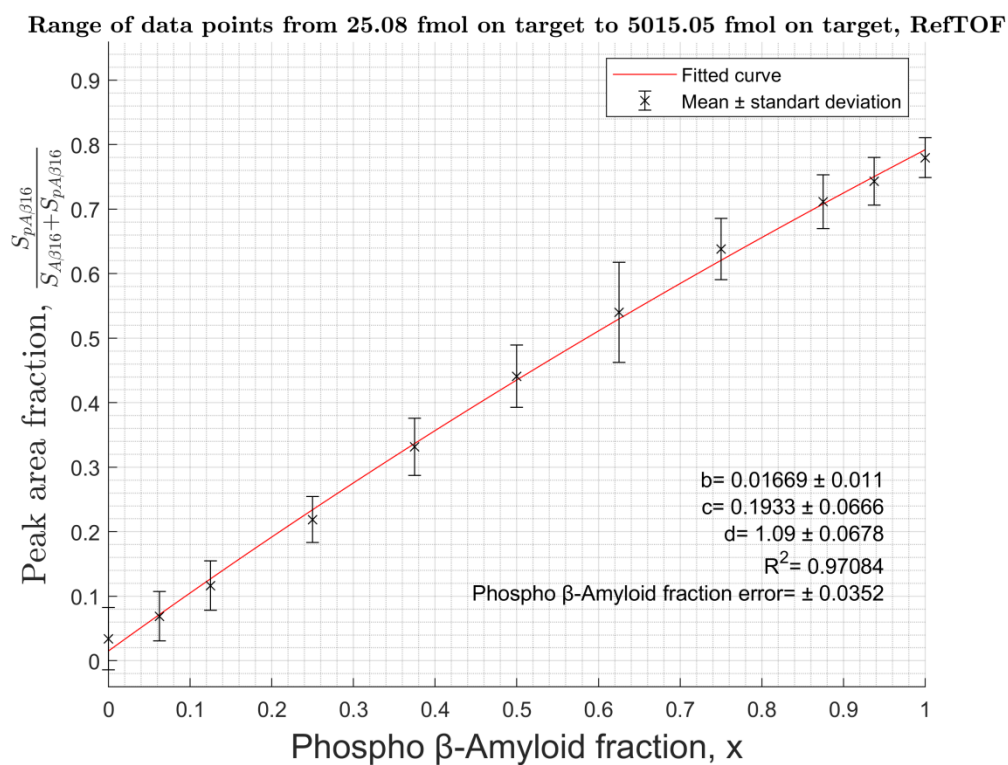

**Figure S9. Calibration curve for A $\beta$ 16 in reflectron mode on a Polished Steel target, 10 mg/ml DHB, 0.5% PA.**

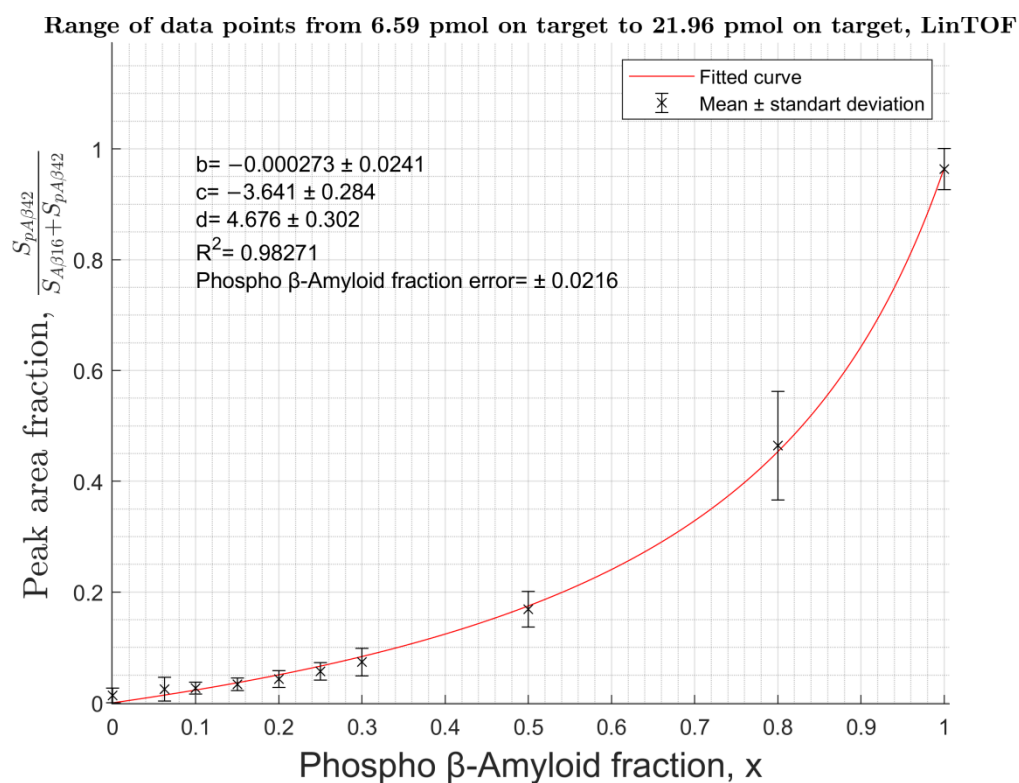

**Figure S10. Calibration curve for A $\beta$ 42 in linear mode on an AnchorChip target, 10 mg/ml DHB, 0.1% TFA.**

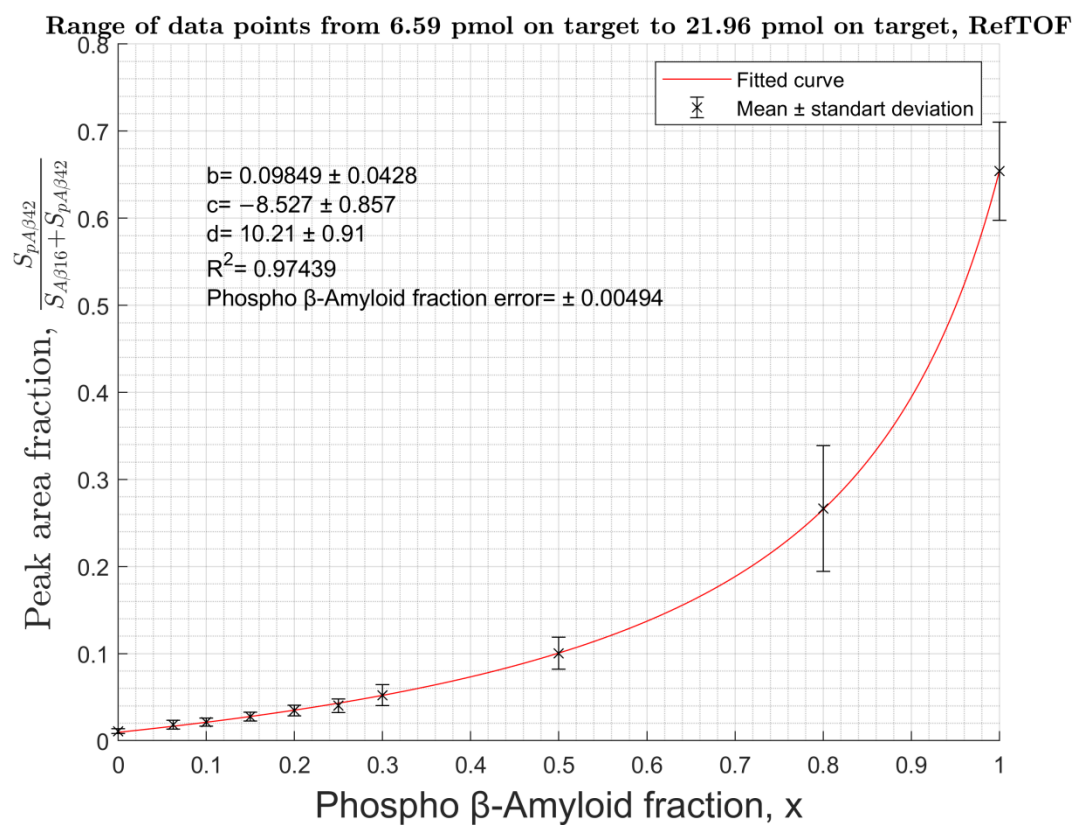

**Figure S11. Calibration curve for A $\beta$ 42 in reflectron mode on an AnchorChip target, 10 mg/ml DHB, 0.1% TFA.**

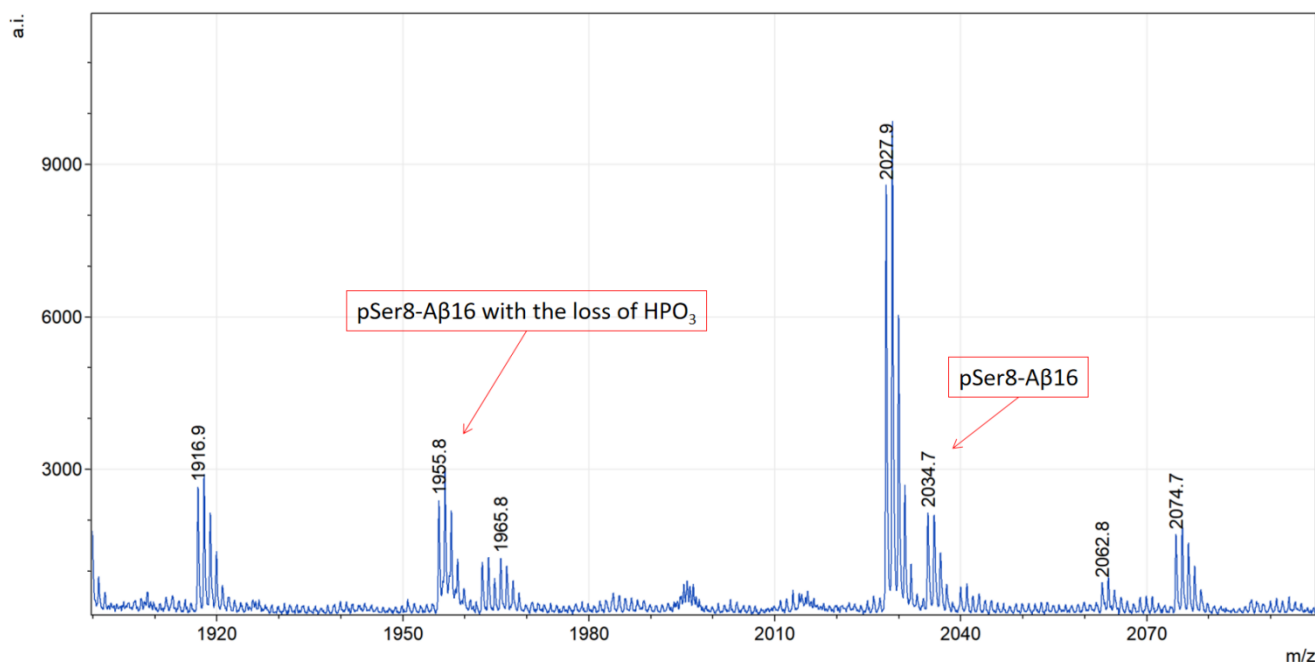

**Figure S12. Mass spectrum of the hydrolyzate of the beta-amyloid fraction obtained from the model sample.**

Human serum diluted 1:50 was spiked with pSer8-A $\beta$ 42 to a final concentration of 100 ng/mL, after which hydrolysis was performed to obtain pSer8-A $\beta$ 16 fragments.

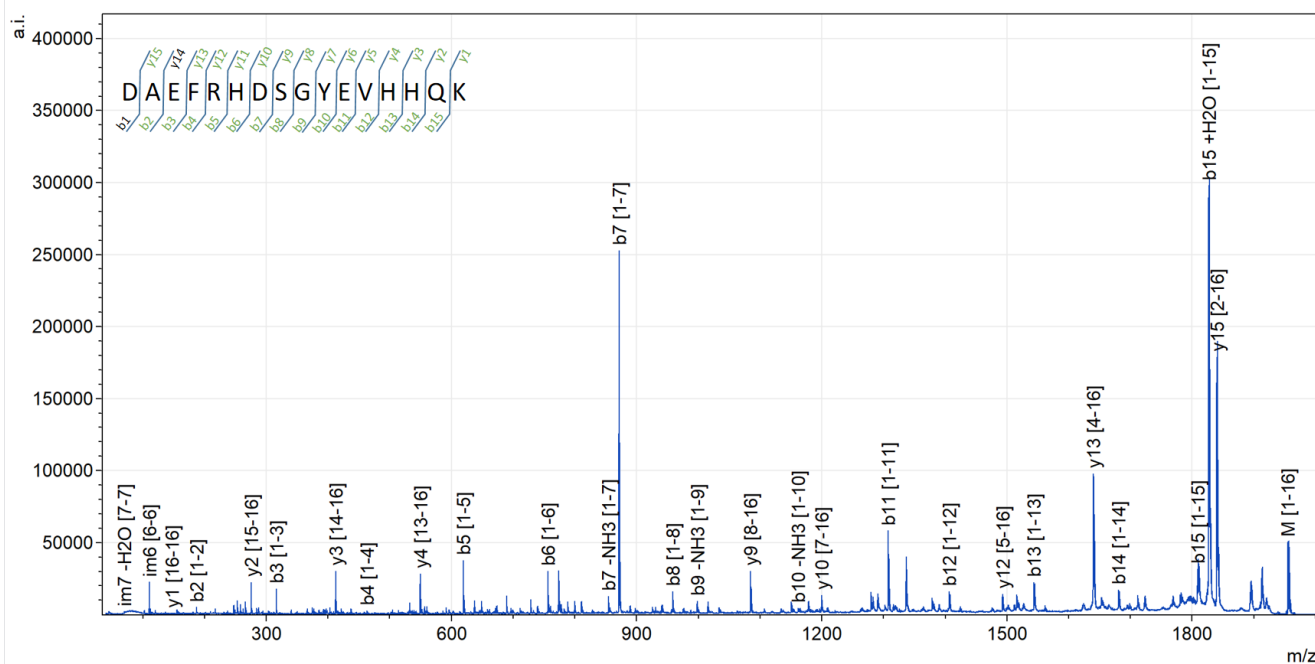

**Figure S13. MS/MS of A $\beta$ 16 from BioPeptide Co. Fragments in peptide sequence marked with color if their peak in spectra with the same m/z: green - found; black - not found.**



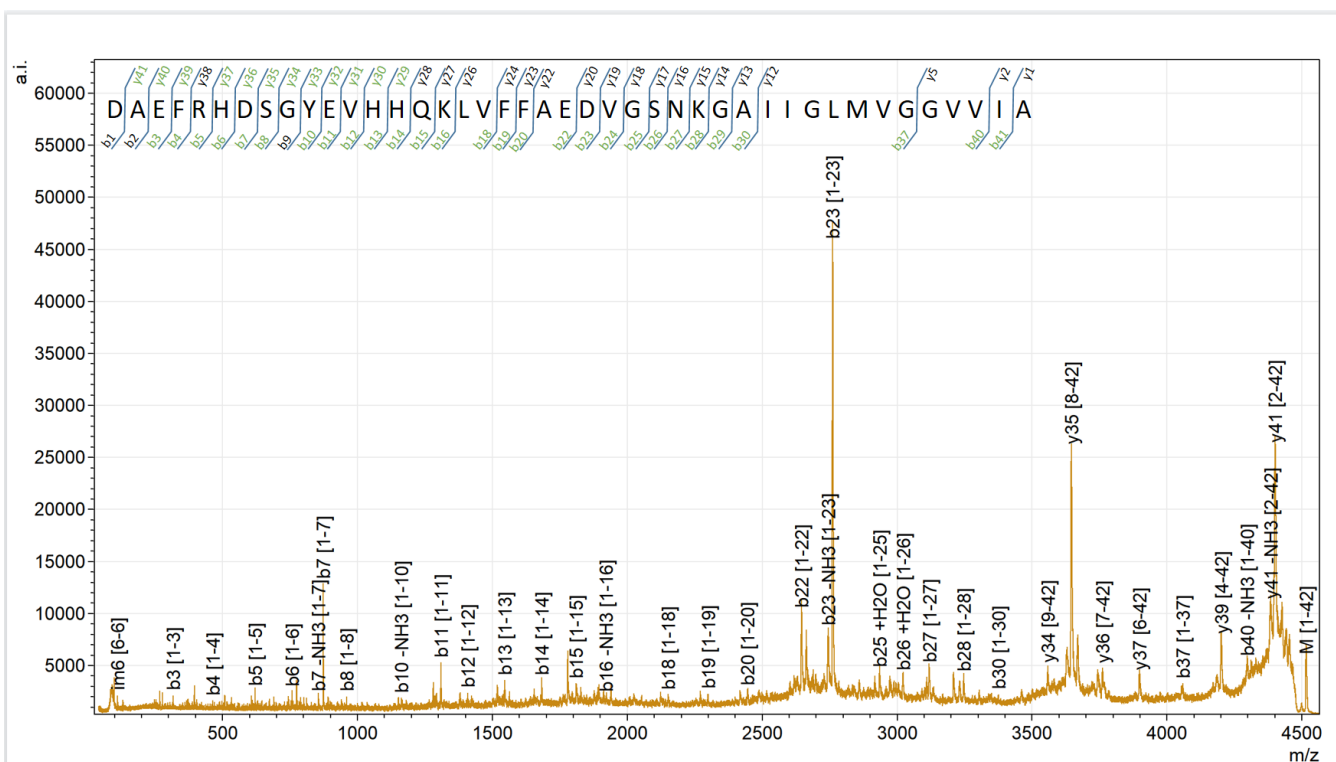

Figure S14. MS/MS of Aβ42 from BioPeptide Co. Fragments in peptide sequence marked with color if their peak in spectra with the same m/z: found - green; not found - black.

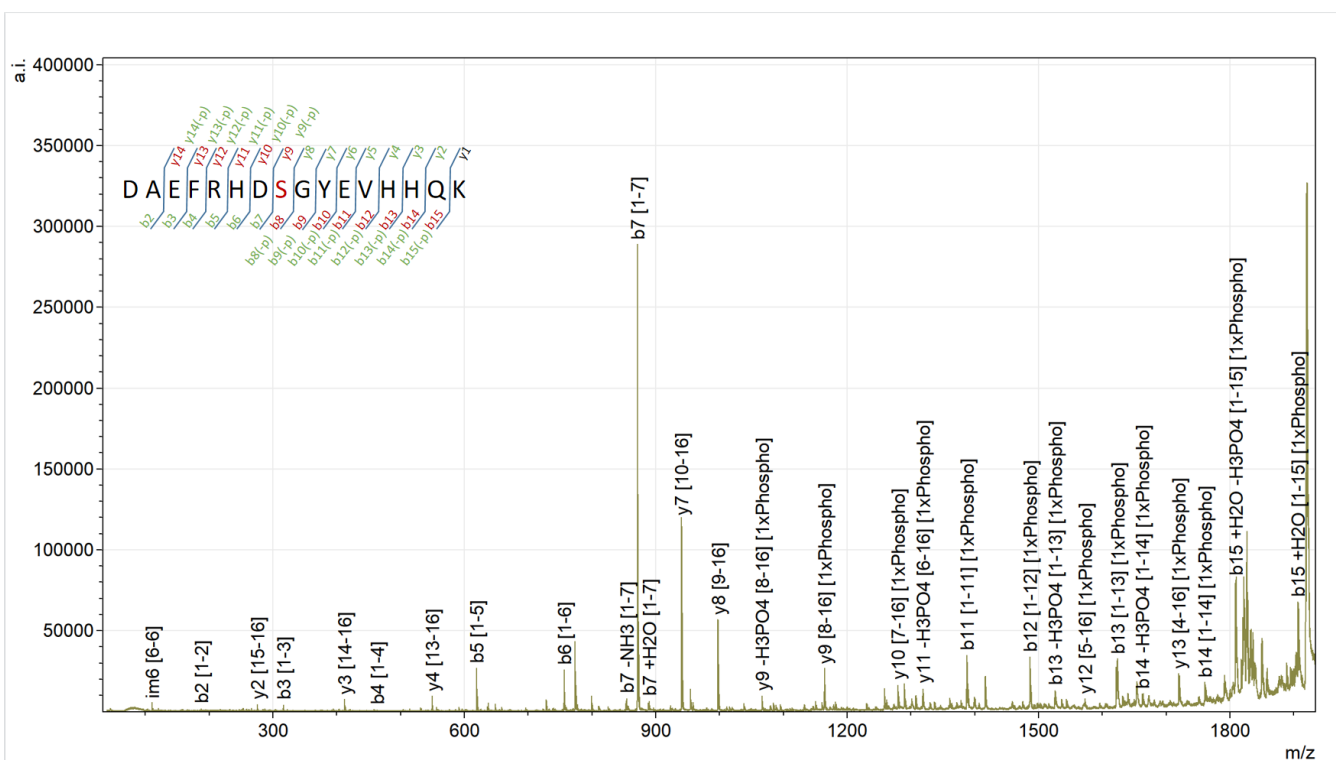

Figure S15. MS/MS of pAβ16 from BioPeptide Co. Fragments in peptide sequence marked with color if their peak in spectra with the same m/z: detected and have phospho group - red; found and it doesn't have phospho group or has lost it - green; not found - black.



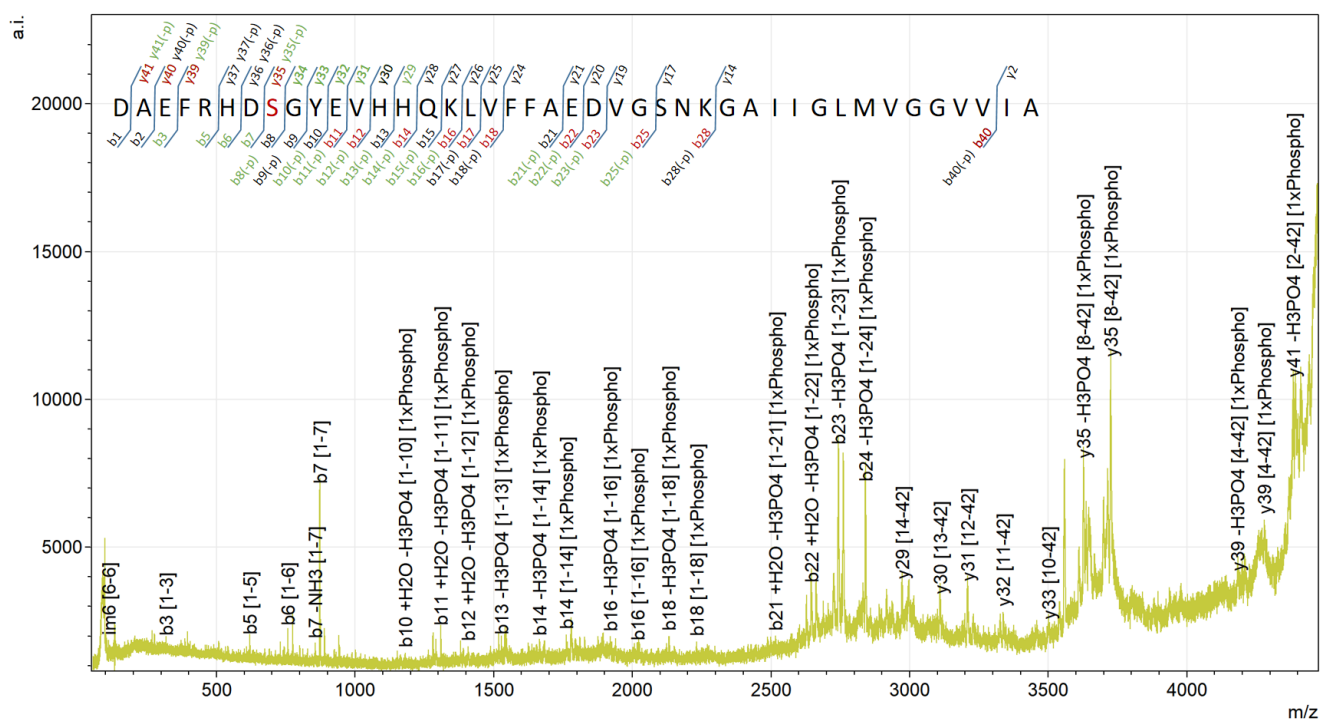

**Figure S16. MS/MS of A $\beta$ 42 from BioPeptide Co. Fragments in peptide sequence marked with color if their peak in spectra with the same m/z: detected and have phospho group - red; found and it doesn't have phospho group or has lost it - green; not found - black.**
